# Supplementary material for: Tumor Suppressor HLJ1 Binds and Functionally Alters Nucleophosmin via Activating Enhancer Binding Protein 2α Complex Formation
Source: Oxford University Press journal article supplement (doi:10.1158/0008-5472.can-09-2453), 2010-02-10
Supplement: 00085472can092453-sup-sfig_1.pdf [file 00085472can092453-sup-sfig_1.pdf]

## Supplementary Figure 1

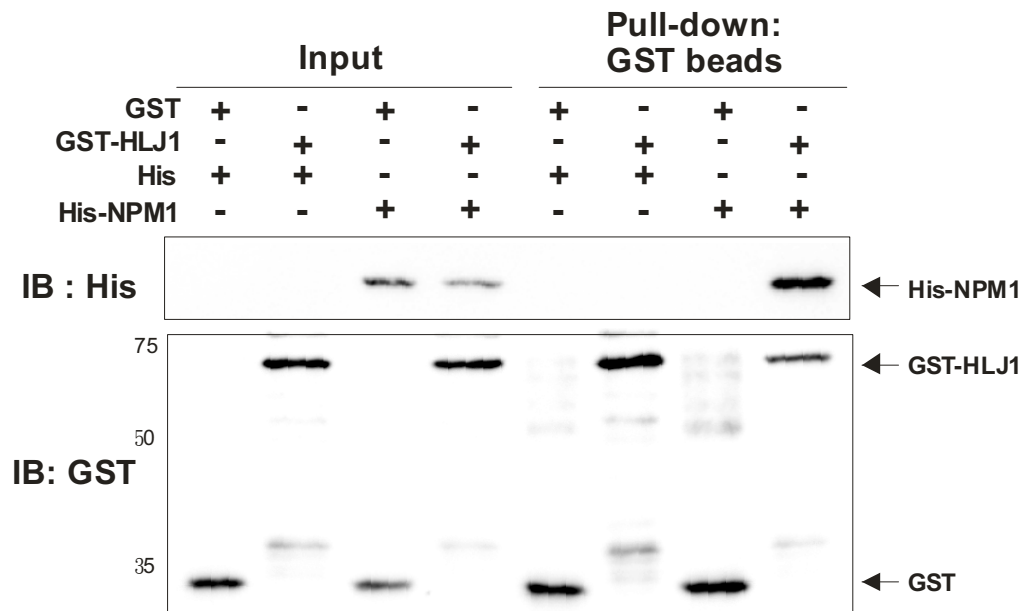

Figure S1. Determination of the interaction between HLJ1 and NPM1 *in vitro*. Recombinant GST-HLJ1 and His-NPM1 were expressed in *E. coli*. The various combinations of mixtures are denoted at the top of figure. The protein mixtures were incubated at 4°C overnight, captured by GST beads, and analyzed by 10% SDS-PAGE, followed by immunoblotting using anti-His and anti-GST antibodies. The inputs were the protein loading controls.
